# Supplementary material for: Estimating the global health impact of gender-based violence and violence against children: a systematic review and meta-analysis protocol
Source: HighWire-hosted journal article supplement (doi:10.1136/bmjopen-2022-061248), 2022-06-01
Supplement: bmjopen-2022-061248supp002_data_supplement.pdf [file bmjopen-2022-061248supp002_data_supplement.pdf]

**Supplementary Table 1. Search Terms for Embase.**

|                                                                        | <b>Concept: Violence</b>                                                                                                                                                                                                                                                                                                                                                                                                                                                                                                                                                                                                                                                                                                        | <b>Concept: Study type</b>                                                                                                                                                                                             | <b>Concept: Risk</b>                                                                                                                                             |
|------------------------------------------------------------------------|---------------------------------------------------------------------------------------------------------------------------------------------------------------------------------------------------------------------------------------------------------------------------------------------------------------------------------------------------------------------------------------------------------------------------------------------------------------------------------------------------------------------------------------------------------------------------------------------------------------------------------------------------------------------------------------------------------------------------------|------------------------------------------------------------------------------------------------------------------------------------------------------------------------------------------------------------------------|------------------------------------------------------------------------------------------------------------------------------------------------------------------|
| Subject Headings (Emtree)                                              | 'sexual violence'/exp<br>'forced sex'/exp<br>'violence'/de<br>'domestic violence'/exp<br>'gender based violence'/exp<br>'partner violence'/exp<br>'dating violence'/exp<br>'physical abuse'/exp<br>'physical violence'/exp<br>'torture'/exp<br>'workplace violence'/exp<br>'gun violence'/exp<br>'battered woman'/exp<br>'child abuse survivor'/exp<br>'exposure to violence'/exp<br>'emotional abuse'/exp<br>'elderly abuse'/exp<br>'sexual harassment'/exp<br>'non-sexual harassment'/de<br>'aggression'/de<br>'verbal hostility'/exp<br>'coercion'/exp<br>'intimidation'/exp<br>'dehumanization'/exp<br>'stalking'/de<br>'childhood adversity'/exp<br>'maltreatment'/exp<br>'corporal punishment'/exp<br>'victimization'/exp | 'case control study'/exp<br>'crossover procedure'/exp<br>'cohort analysis'/exp<br>'systematic review'/exp<br>'systematic review (topic)'/exp<br>'meta analysis'/exp<br>'meta analysis (topic)'/exp<br>'twin study'/exp | 'statistics'/exp<br>'statistical parameters'/exp<br>'risk'/exp<br>'risk ratio'/exp<br>'correlation'/exp<br>'statistical analysis'/exp                            |
| Free text terms (searched in title, abstract, and keyword (:ti,ab,kw)) | violence<br>'sexual assault'<br>'sexual harassment'<br>'sexual abuse'<br>'sex abuse'<br>rape<br>'forced sex'<br>'sexual coercion'<br>'reproductive coercion'<br>'sex trafficking'<br>'sexual exploitation'<br>'forced marriage*'                                                                                                                                                                                                                                                                                                                                                                                                                                                                                                | 'systematic review'<br>meta-analysis<br>cohort<br>cross-over<br>case-control<br>prospective<br>retrospective<br>longitudinal<br>follow-up<br>followup                                                                  | 'risk*'<br>'odds'<br>'cross-product ratio*'<br>'hazards ratio*'<br>'hazard ratio*'<br>statistic*<br>'HR'<br>'RR'<br>'aOR'<br>relation*<br>correlat*<br>associat* |

|  |                                                                                                                                                                                                                                                                                                                                                                                                                                                                                                                                                                                                                                                                                                                                                                                                                                                       |  |        |
|--|-------------------------------------------------------------------------------------------------------------------------------------------------------------------------------------------------------------------------------------------------------------------------------------------------------------------------------------------------------------------------------------------------------------------------------------------------------------------------------------------------------------------------------------------------------------------------------------------------------------------------------------------------------------------------------------------------------------------------------------------------------------------------------------------------------------------------------------------------------|--|--------|
|  | 'child marriage*'<br>'early marriage*'<br>'child bride*'<br>CEFM<br>'female genital mutilation'<br>'female genital cutting'<br>'female circumcision'<br>'female genital<br>circumcision'<br>infibulation*<br>clitoridectom*<br>clitorrectom*<br>'ritual female genital<br>surger*'<br>FGM<br>'physical abuse'<br>'psychological abuse'<br>'emotional abuse'<br>'economic abuse'<br>'financial abuse'<br>'verbal abuse'<br>maltreatment<br>'violent discipline'<br>'corporal punishment'<br>'adverse childhood<br>experience*'<br>molestation<br>'child abuse'<br>'partner abuse'<br>'dating abuse'<br>'wife abuse'<br>'spouse abuse'<br>'domestic abuse'<br>'elder abuse'<br>'senior abuse'<br>'aged abuse'<br>victimization<br>dehumanization<br>victimisation<br>dehumanisation<br>stalking<br>cyberviolence<br>cybervictimization<br>cyberstalking |  | likel* |
|--|-------------------------------------------------------------------------------------------------------------------------------------------------------------------------------------------------------------------------------------------------------------------------------------------------------------------------------------------------------------------------------------------------------------------------------------------------------------------------------------------------------------------------------------------------------------------------------------------------------------------------------------------------------------------------------------------------------------------------------------------------------------------------------------------------------------------------------------------------------|--|--------|

Supplementary Table 2. Search Terms for CINAHL.

|                                                                                | Concept: Violence                                                                                                                                                                                                                                                                                                                                                                                                                                                                                                                                                                                                 | Concept: Study type                                                                                                                                                       | Concept: Risk                                                                                                                                                          |
|--------------------------------------------------------------------------------|-------------------------------------------------------------------------------------------------------------------------------------------------------------------------------------------------------------------------------------------------------------------------------------------------------------------------------------------------------------------------------------------------------------------------------------------------------------------------------------------------------------------------------------------------------------------------------------------------------------------|---------------------------------------------------------------------------------------------------------------------------------------------------------------------------|------------------------------------------------------------------------------------------------------------------------------------------------------------------------|
| Subject Headings (MH)                                                          | (MH "Sexual Abuse+")<br>(MH "Violence")<br>(MH "Domestic Violence+")<br>(MH "Gender-Based Violence")<br>(MH "Circumcision, Female")<br>(MH "Dating Violence")<br>(MH "Torture")<br>(MH "Workplace Violence")<br>(MH "Gun Violence")<br>(MH "Battered Women")<br>(MH "Child Abuse Survivors")<br>(MH "Exposure to Violence")<br>(MH "Emotional Abuse")<br>(MH "Sexual Harassment")<br>(MH "Aggression")<br>(MH "Verbal Abuse")<br>(MH "Coercion")<br>(MH "Dehumanization")<br>(MH "Stalking")<br>(MH "Adverse Childhood Experiences")<br>(MH "Sibling Violence")<br>(MH "School Violence")<br>(MH "Student Abuse") | (MH "Case Control Studies+")<br>(MH "Crossover Design")<br>(MH "Systematic Review")<br>(MH "Meta Analysis")<br>(MH "Prospective Studies+")<br>(MH "Retrospective Design") | (MH "Statistics+")<br>(MH "Data Analysis, Statistical+")                                                                                                               |
| Free text terms (searched in Title & Abstract; keyword not a searchable field) | violence<br>"sexual assault"<br>"sexual harassment"<br>"sexual abuse"<br>"sex abuse"<br>rape<br>"forced sex"<br>"sexual coercion"<br>"reproductive coercion"<br>"sex trafficking"<br>"sexual exploitation"<br>"forced marriage*"<br>"child marriage*"                                                                                                                                                                                                                                                                                                                                                             | "systematic review"<br>meta-analysis<br>cohort<br>cross-over<br>case-control<br>prospective<br>retrospective<br>longitudinal<br>follow-up<br>followup                     | risk*<br>odds<br>"cross-product ratio*"<br>"hazards ratio*"<br>"hazard ratio*"<br>statistic*<br>"HR"<br>"RR"<br>"aOR"<br>relation*<br>correlat*<br>associat*<br>likel* |

|  |                                                                                                                                                                                                                                                                                                                                                                                                                                                                                                                                                                                                                                                                                                                                                                                                                        |  |  |
|--|------------------------------------------------------------------------------------------------------------------------------------------------------------------------------------------------------------------------------------------------------------------------------------------------------------------------------------------------------------------------------------------------------------------------------------------------------------------------------------------------------------------------------------------------------------------------------------------------------------------------------------------------------------------------------------------------------------------------------------------------------------------------------------------------------------------------|--|--|
|  | "early marriage*"<br>"child bride*"<br>CEFM<br>"female genital mutilation"<br>"female genital cutting"<br>"female circumcision"<br>"female genital circumcision"<br>infibulation*<br>clitoridectom*<br>clitorectom*<br>"ritual female genital surger*"<br>FGM<br>"physical abuse"<br>"psychological abuse"<br>"emotional abuse"<br>"economic abuse"<br>"financial abuse"<br>"verbal abuse"<br>maltreatment<br>"violent discipline"<br>"corporal punishment"<br>"adverse childhood experience*"<br>molestation<br>"child abuse"<br>"partner abuse"<br>"dating abuse"<br>"wife abuse"<br>"spouse abuse"<br>"domestic abuse"<br>"elder abuse"<br>"senior abuse"<br>"aged abuse"<br>victimization<br>dehumanization<br>victimisation<br>dehumanisation<br>stalking<br>cyberviolence<br>cybervictimization<br>cyberstalking |  |  |
|--|------------------------------------------------------------------------------------------------------------------------------------------------------------------------------------------------------------------------------------------------------------------------------------------------------------------------------------------------------------------------------------------------------------------------------------------------------------------------------------------------------------------------------------------------------------------------------------------------------------------------------------------------------------------------------------------------------------------------------------------------------------------------------------------------------------------------|--|--|

**Supplementary Table 3. Search Terms for PsycInfo.**

|                                | <b>Concept: Violence</b>                                                                                                                                                                                                                                                                                                                                                                                                                                                                                                                                                                                                                                               | <b>Concept: Study type</b>                                                                                                                                                  | <b>Concept: Risk</b>                                                                                 |
|--------------------------------|------------------------------------------------------------------------------------------------------------------------------------------------------------------------------------------------------------------------------------------------------------------------------------------------------------------------------------------------------------------------------------------------------------------------------------------------------------------------------------------------------------------------------------------------------------------------------------------------------------------------------------------------------------------------|-----------------------------------------------------------------------------------------------------------------------------------------------------------------------------|------------------------------------------------------------------------------------------------------|
| PsycInfo Subject Headings (DE) | DE(<br>"Sexual Violence"<br>"Sex Offenses"<br>"Sexual Abuse"<br>"Sexual Coercion"<br>"Sex Trafficking"<br>"Violence"<br>"Domestic Violence"<br>"Child Abuse"<br>"Elder Abuse"<br>"Circumcision"<br>"Intimate Partner Violence"<br>"Dating Violence"<br>"Physical Abuse"<br>"Physical Discipline"<br>"Punishment"<br>"Rape"<br>"Acquaintance Rape"<br>"Torture"<br>"Workplace Violence"<br>"Gun Violence"<br>"Battered Females"<br>"Exposure to Violence"<br>"Emotional Abuse"<br>"Sexual Harassment"<br>"Aggressive Behavior"<br>"Verbal Abuse"<br>"Coercion"<br>"Stalking"<br>"Childhood Adversity"<br>"School Violence"<br>"Police Violence"<br>"Victimization"<br>) | DE(<br>"Cohort Analysis"<br>"Followup Studies"<br>"Longitudinal Studies"<br>"Retrospective Studies"<br>"Prospective Studies"<br>"Systematic Review"<br>"Meta Analysis"<br>) | DE(<br>"Statistics"<br>"Statistical Analysis"<br>"Risk Assessment"<br>"Statistical Correlation"<br>) |
| MeSH terms (MA)                | MA(<br>"Sex Offenses"<br>"Domestic Violence"<br>"Gender-Based Violence"<br>"Intimate Partner Violence"<br>"Physical Abuse"<br>"Rape"                                                                                                                                                                                                                                                                                                                                                                                                                                                                                                                                   | MA(<br>"Case-Control Studies"<br>"Cross-Over Studies"<br>"Cohort Studies"<br>)                                                                                              | MA(<br>"Statistics as Topic"<br>Risk<br>Odds Ratio<br>)                                              |

|                                                             |                                                                                                                                                                                                                                                                                                                                                                                                                                                                                                                                                                                                                                                                                                                                     |                                                                                                                                                                                                  |                                                                                                                                                                                                                               |
|-------------------------------------------------------------|-------------------------------------------------------------------------------------------------------------------------------------------------------------------------------------------------------------------------------------------------------------------------------------------------------------------------------------------------------------------------------------------------------------------------------------------------------------------------------------------------------------------------------------------------------------------------------------------------------------------------------------------------------------------------------------------------------------------------------------|--------------------------------------------------------------------------------------------------------------------------------------------------------------------------------------------------|-------------------------------------------------------------------------------------------------------------------------------------------------------------------------------------------------------------------------------|
|                                                             | <p>"Torture"</p> <p>"Workplace Violence"</p> <p>"Gun violence"</p> <p>"Battered Women"</p> <p>"Adult Survivors of Child abuse"</p> <p>"Exposure to Violence"</p> <p>"Emotional Abuse"</p> <p>"Sexual Harassment"</p> <p>"Coercion"</p> <p>"Dehumanization"</p> <p>"stalking"</p> <p>"adverse childhood experiences"</p> <p>)</p>                                                                                                                                                                                                                                                                                                                                                                                                    |                                                                                                                                                                                                  |                                                                                                                                                                                                                               |
| Free text terms (searched in Title, Abstract, and Keywords) | <p>violence</p> <p>"sexual assault"</p> <p>"sexual harassment"</p> <p>"sexual abuse"</p> <p>"sex abuse"</p> <p>rape</p> <p>"forced sex"</p> <p>"sexual coercion"</p> <p>"reproductive coercion"</p> <p>"sex trafficking"</p> <p>"sexual exploitation"</p> <p>"forced marriage*"</p> <p>"child marriage*"</p> <p>"early marriage*"</p> <p>"child bride*"</p> <p>CEFM</p> <p>"female genital mutilation"</p> <p>"female genital cutting"</p> <p>"female circumcision"</p> <p>"female genital circumcision"</p> <p>infibulation*</p> <p>clitoridectom*</p> <p>clitorectom*</p> <p>"ritual female genital surger*"</p> <p>FGM</p> <p>"physical abuse"</p> <p>"psychological abuse"</p> <p>"emotional abuse"</p> <p>"economic abuse"</p> | <p>"systematic review"</p> <p>meta-analysis</p> <p>cohort</p> <p>cross-over</p> <p>case-control</p> <p>prospective</p> <p>retrospective</p> <p>longitudinal</p> <p>follow-up</p> <p>followup</p> | <p>risk*</p> <p>odds</p> <p>"cross-product ratio*"</p> <p>"hazards ratio*"</p> <p>"hazard ratio*"</p> <p>statistic*</p> <p>"HR"</p> <p>"RR"</p> <p>"aOR"</p> <p>relation*</p> <p>correlat*</p> <p>associat*</p> <p>likel*</p> |

|  |                                                                                                                                                                                                                                                                                                                                                                                                                                                                    |  |  |
|--|--------------------------------------------------------------------------------------------------------------------------------------------------------------------------------------------------------------------------------------------------------------------------------------------------------------------------------------------------------------------------------------------------------------------------------------------------------------------|--|--|
|  | "financial abuse"<br>"verbal abuse"<br>maltreatment<br>"violent discipline"<br>"corporal punishment"<br>"adverse childhood<br>experience*"<br>molestation<br>"child abuse"<br>"partner abuse"<br>"dating abuse"<br>"wife abuse"<br>"spouse abuse"<br>"domestic abuse"<br>"elder abuse"<br>"senior abuse"<br>"aged abuse"<br>victimization<br>dehumanization<br>victimisation<br>dehumanisation<br>stalking<br>cyberviolence<br>cybervictimization<br>cyberstalking |  |  |
|--|--------------------------------------------------------------------------------------------------------------------------------------------------------------------------------------------------------------------------------------------------------------------------------------------------------------------------------------------------------------------------------------------------------------------------------------------------------------------|--|--|

**Supplementary Table 4. Search Terms for Global Index Medicus.**

|                                  | <b>Concept: Violence</b>                                                                                                                                                                                                                                                                                                                                                                                                                                         | <b>Concept: Study type</b>                                                                                                                                    | <b>Concept: Risk</b>                                                                                                                                                                                                                 |
|----------------------------------|------------------------------------------------------------------------------------------------------------------------------------------------------------------------------------------------------------------------------------------------------------------------------------------------------------------------------------------------------------------------------------------------------------------------------------------------------------------|---------------------------------------------------------------------------------------------------------------------------------------------------------------|--------------------------------------------------------------------------------------------------------------------------------------------------------------------------------------------------------------------------------------|
| Subject Descriptors              | I01.198.240.748*<br>Violence<br>I01.198.240.856.350*<br>I01.198.240.856.463<br>I01.198.240.856.575*<br>I01.198.240.856.688<br>I01.198.240.748.640<br>I01.198.240.856.825<br>I01.198.240.856.912<br>I01.198.240.856.519<br>M01.975.155<br>M01.135.500<br>I01.880.735.900.869<br>I01.880.735.305<br>SP9.020.800.010<br>"Harassment, Non-Sexual"<br>"Aggression"<br>I01.880.604.316<br>Dehumanization<br>F01.145.813.191*<br>I01.880.735.223.500<br>I01.880.735.035 | E05.318.372.500.500*<br>E05.318.370.150<br>E05.318.372.500.750*<br>V03.850<br>L01.178.682.759.575<br>V03.600<br>E05.318.370.500*<br>V03.900                   | E05.318.740*<br>E05.318.740.600.800*<br>E05.318.740.600.600                                                                                                                                                                          |
| Title, abstract, subject (tw:()) | violence<br>"sexual assault"<br>"sexual harassment"<br>"sexual abuse"<br>"sex abuse"<br>rape<br>"forced sex"<br>"sexual coercion"<br>"reproductive coercion"<br>"sex trafficking"<br>"sexual exploitation"<br>"forced marriage"<br>"forced marriages"<br>"child marriage"<br>"child marriages"<br>"early marriage"<br>"early marriages"<br>"child bride"<br>"child brides"<br>CEFM<br>"female genital mutilation"<br>"female genital cutting"                    | "systematic review"<br>"meta-analysis"<br>cohort<br>"cross-over"<br>"case-control"<br>Prospective<br>retrospective<br>longitudinal<br>"follow-up"<br>followup | risk*<br>odds<br>"cross-product ratio"<br>"cross-product ratios"<br>"hazards ratio"<br>"hazards ratios"<br>"hazard ratio"<br>"hazard ratios"<br>statistic*<br>"HR"<br>"RR"<br>"aOR"<br>relation*<br>correlat*<br>associat*<br>likel* |



|  |                                                                                                                                                                                                                                                                                                                                                                                                                                                                                                                                                                                                                                                                                                                                                                                                    |  |  |
|--|----------------------------------------------------------------------------------------------------------------------------------------------------------------------------------------------------------------------------------------------------------------------------------------------------------------------------------------------------------------------------------------------------------------------------------------------------------------------------------------------------------------------------------------------------------------------------------------------------------------------------------------------------------------------------------------------------------------------------------------------------------------------------------------------------|--|--|
|  | "female circumcision"<br>"female genital<br>circumcision"<br>infibulation*<br>clitoridectom*<br>clitorectom*<br>"ritual female genital<br>surgery"<br>"ritual female genital<br>surgeries"<br>FGM<br>"physical abuse"<br>"psychological abuse"<br>"emotional abuse"<br>"economic abuse"<br>"financial abuse"<br>"verbal abuse"<br>maltreatment<br>"violent discipline"<br>"corporal punishment"<br>"adverse childhood<br>experience"<br>"adverse childhood<br>experiences"<br>molestation<br>"child abuse"<br>"partner abuse"<br>"dating abuse"<br>"wife abuse"<br>"spouse abuse"<br>"domestic abuse"<br>"elder abuse"<br>"senior abuse"<br>"aged abuse"<br>victimization<br>dehumanization<br>victimisation<br>dehumanisation<br>stalking<br>cyberviolence<br>cybervictimization<br>cyberstalking |  |  |
|--|----------------------------------------------------------------------------------------------------------------------------------------------------------------------------------------------------------------------------------------------------------------------------------------------------------------------------------------------------------------------------------------------------------------------------------------------------------------------------------------------------------------------------------------------------------------------------------------------------------------------------------------------------------------------------------------------------------------------------------------------------------------------------------------------------|--|--|

Supplementary Table 5. Search Terms for Cochrane.

|                           | Concept: Violence                                                                                                                                                                                                                                                                                                                                                                                                                                                                                                                                                                                | Concept: Study type                                                                                                                                                     | Concept: Risk                                                                                                                                                                                                                           |
|---------------------------|--------------------------------------------------------------------------------------------------------------------------------------------------------------------------------------------------------------------------------------------------------------------------------------------------------------------------------------------------------------------------------------------------------------------------------------------------------------------------------------------------------------------------------------------------------------------------------------------------|-------------------------------------------------------------------------------------------------------------------------------------------------------------------------|-----------------------------------------------------------------------------------------------------------------------------------------------------------------------------------------------------------------------------------------|
| Subject Headings [mh].    | [mh "Sex Offenses"].<br>[mh ^"Violence"].<br>[mh "Domestic Violence"].<br>[mh "Gender-Based Violence"].<br>[mh "Intimate Partner Violence"].<br>[mh "Physical Abuse"].<br>[mh "Rape"].<br>[mh "Torture"].<br>[mh "Workplace Violence"].<br>[mh "Gun violence"].<br>[mh "Battered Women"].<br>[mh "Adult Survivors of Child abuse"].<br>[mh "Exposure to Violence"].<br>[mh "Emotional Abuse"].<br>[mh "Sexual Harassment"].<br>[mh ^"Harassment, Non-Sexual"].<br>[mh ^"Aggression"].<br>[mh "Coercion"].<br>[mh "Dehumanization"].<br>[mh "stalking"].<br>[mh "adverse childhood experiences"]. | [mh "Case-Control Studies"].<br>[mh "Cross-Over Studies"].<br>[mh "Cohort Studies"].<br>[mh "Systematic Review"].<br>[mh "Meta-Analysis"].<br>[mh "Twin Study"].        | [mh "Statistics as Topic"].<br>[mh Risk].<br>[mh "Odds Ratio"].                                                                                                                                                                         |
| Free text terms :ti,ab,kw | violence<br>"sexual assault"<br>"sexual harassment"<br>"sexual abuse"<br>"sex abuse"<br>rape<br>"forced sex"<br>"sexual coercion"<br>"reproductive coercion"<br>"sex trafficking"<br>"sexual exploitation"<br>(forced OR child OR early NEXT marriage*)<br>(child NEXT bride*)<br>CEFM<br>"female genital mutilation"<br>"female genital cutting"                                                                                                                                                                                                                                                | "systematic review"<br>"meta-analysis"<br>"cohort"<br>"cross-over"<br>"case-control"<br>"prospective"<br>"retrospective"<br>"longitudinal"<br>"follow-up"<br>"followup" | "risk"<br>"odds"<br>"cross-product ratio"<br>"cross-product ratios"<br>"hazards ratio"<br>"hazards ratios"<br>"hazard ratio"<br>"hazard ratios"<br>statistic*<br>"HR"<br>"RR"<br>"aOR"<br>relation*<br>correlat*<br>associat*<br>likel* |

|  |                                                                                                                                                                                                                                                                                                                                                                                                                                                                                                                                                                                                                                                                                                                               |  |  |
|--|-------------------------------------------------------------------------------------------------------------------------------------------------------------------------------------------------------------------------------------------------------------------------------------------------------------------------------------------------------------------------------------------------------------------------------------------------------------------------------------------------------------------------------------------------------------------------------------------------------------------------------------------------------------------------------------------------------------------------------|--|--|
|  | "female circumcision"<br>"female genital<br>circumcision"<br>infibulation*<br>clitoridectom*<br>clitorectom*<br>"ritual female genital<br>surgery"<br>"ritual female genital<br>surgeries"<br>FGM<br>((physical OR psychological<br>OR emotional OR economic<br>OR financial OR verbal)<br>NEXT abuse)<br>maltreatment<br>"violent discipline"<br>"corporal punishment"<br>"adverse childhood<br>experience"<br>"adverse childhood<br>experiences"<br>molestation<br>((child OR partner OR dating<br>OR wife OR spouse OR<br>domestic OR elder OR<br>senior OR aged) NEXT<br>abuse)<br>victimization<br>dehumanization<br>victimisation<br>dehumanisation<br>stalking<br>cyberviolence<br>cybervictimization<br>cyberstalking |  |  |
|--|-------------------------------------------------------------------------------------------------------------------------------------------------------------------------------------------------------------------------------------------------------------------------------------------------------------------------------------------------------------------------------------------------------------------------------------------------------------------------------------------------------------------------------------------------------------------------------------------------------------------------------------------------------------------------------------------------------------------------------|--|--|

**Supplementary Table 6. Search Terms for Web of Science.**

|                                                                                     | <b>Concept: Violence</b>                                                                                                                                                                                                                                                                                                                                                                                                                                                                                                                                                                                                                                                                                                                                                                                                          | <b>Concept: Study type</b>                                                                                                                              | <b>Concept: Risk</b>                                                                                                                                                       |
|-------------------------------------------------------------------------------------|-----------------------------------------------------------------------------------------------------------------------------------------------------------------------------------------------------------------------------------------------------------------------------------------------------------------------------------------------------------------------------------------------------------------------------------------------------------------------------------------------------------------------------------------------------------------------------------------------------------------------------------------------------------------------------------------------------------------------------------------------------------------------------------------------------------------------------------|---------------------------------------------------------------------------------------------------------------------------------------------------------|----------------------------------------------------------------------------------------------------------------------------------------------------------------------------|
| Topic<br>(searches<br>title, abstract,<br>author<br>keywords,<br>Keywords<br>Plus®) | violence<br>"sexual assault"<br>"sexual harassment"<br>"sexual abuse"<br>"sex abuse"<br>rape<br>"forced sex"<br>"sexual coercion"<br>"reproductive coercion"<br>"sex trafficking"<br>"sexual exploitation"<br>"forced marriage*"<br>"child marriage*"<br>"early marriage*"<br>"child bride*"<br>CEFM<br>"female genital<br>mutilation"<br>"female genital cutting"<br>"female circumcision"<br>"female genital<br>circumcision"<br>infibulation*<br>clitoridectom*<br>clitorectom*<br>"ritual female genital<br>surger*"<br>FGM<br>"physical abuse"<br>"psychological abuse"<br>"emotional abuse"<br>"economic abuse"<br>"financial abuse"<br>"verbal abuse"<br>Maltreatment<br>torture<br>"violent discipline"<br>"corporal punishment"<br>"adverse childhood<br>experience*"<br>molestation<br>"child abuse"<br>"partner abuse" | "systematic review"<br>"meta-analysis"<br>cohort<br>cross-over<br>case-control<br>prospective<br>retrospective<br>longitudinal<br>follow-up<br>followup | "risk*"<br>"odds"<br>"cross-product ratio*"<br>"hazards ratio*"<br>"hazard ratio*"<br>statistic*<br>"HR"<br>"RR"<br>"aOR"<br>relation*<br>correlat*<br>associat*<br>likel* |

|  |                                                                                                                                                                                                                                                                                       |  |  |
|--|---------------------------------------------------------------------------------------------------------------------------------------------------------------------------------------------------------------------------------------------------------------------------------------|--|--|
|  | "dating abuse"<br>"wife abuse"<br>"battered wom*n"<br>"spouse abuse"<br>"domestic abuse"<br>"elder abuse"<br>"senior abuse"<br>"aged abuse"<br>victimization<br>dehumanization<br>victimisation<br>dehumanisation<br>stalking<br>cyberviolence<br>cybervictimization<br>cyberstalking |  |  |
|--|---------------------------------------------------------------------------------------------------------------------------------------------------------------------------------------------------------------------------------------------------------------------------------------|--|--|
